# Supplementary material for: Whole-Exome Sequencing Enables the Diagnosis of Variant-Type Xeroderma Pigmentosum
Source: PubMed Central journal article supplement (PMC6543889; doi:10.3389/fgene.2019.00495), 2019-05-24
Supplement: Image_1.pdf [file Image_1.pdf]

Supplementary Figure 1

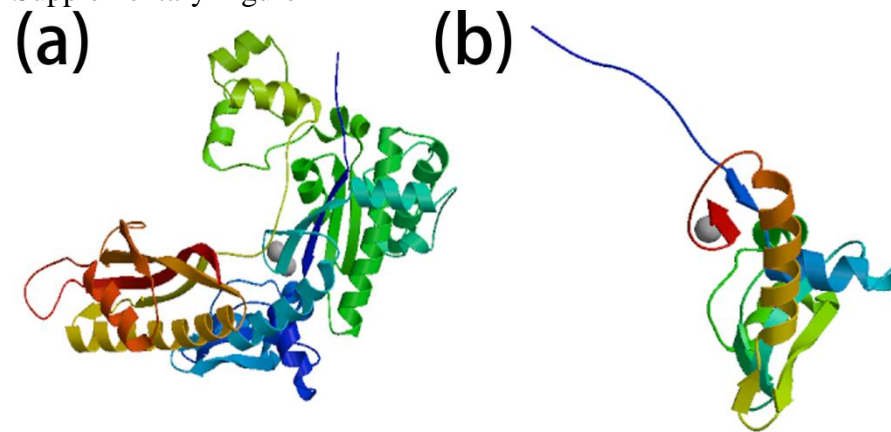

Supplementary Figure 1: Protein model of DNA polymerase eta. Protein models of DNA polymerase eta in normal controls (a) and patients with mutations in the POLH gene (b) show different lengths and configurations.
