# Supplementary material for: Whole-Exome Sequencing Enables the Diagnosis of Variant-Type Xeroderma Pigmentosum
Source: PubMed Central journal article supplement (PMC6543889; doi:10.3389/fgene.2019.00495), 2019-05-24
Supplement: Table_1.pdf [file Table_1.pdf]

Supplementary Table 1 Possible mutation sites in Whole-exome sequencing and Sanger sequencing results

| No. | Coordinate<br>(GRCh37) | Ref       | Alt  | Gene<br>name   | WES+SAS |     |        |     | SAS    |      |     |     |     |
|-----|------------------------|-----------|------|----------------|---------|-----|--------|-----|--------|------|-----|-----|-----|
|     |                        |           |      |                | Patient |     | Normal |     | Normal |      |     |     |     |
|     |                        |           |      |                | IV1     | IV5 | IV4    | V2  | III1   | III2 | IV2 | IV3 | V1  |
| 1   | 6: 43555088            | T         | TA   | <i>POLH</i>    | 1/1     | 1/1 | 0/0    | 0/0 | 0/1    | 0/1  | 0/0 | 0/0 | 0/1 |
| 2   | 6: 44255349            | A         | G    | <i>TCTE1</i>   | 1/1     | 1/1 | 0/0    | 0/0 | 0/1    | 0/1  | 0/0 | 0/0 | 0/1 |
| 3   | 1:14106396             | T         | TCCC | <i>PRDM2</i>   | 1/1     | 1/1 | 0/0    | 0/1 | 0/1    | 1/1  | 0/0 | 1/1 | 0/1 |
| 4   | 2:24387179             | C         | CG   | <i>FAM228B</i> | 1/1     | 1/1 | 0/0    | 0/1 | 0/1    | 1/1  | 0/0 | 0/1 | 0/1 |
| 5   | 6:160560896            | CCTGGTAAG | C    | <i>SLC22A1</i> | 1/1     | 1/1 | 0/0    | 0/1 | 0/1    | 0/1  | 0/0 | 1/1 | 0/1 |
| 6   | 7: 82581491            | A         | ATCC | <i>PCLO</i>    | 1/1     | 1/1 | 0/0    | 0/0 | 0/1    | 1/1  | 0/0 | 0/1 | 0/1 |
| 7   | 7: 131195094           | GAAAAAA   | G    | <i>PODXL</i>   | 1/1     | 1/1 | 0/0    | 0/0 | 0/1    | 1/1  | 0/0 | 0/1 | 0/1 |
| 8   | 9: 97080926            | TCTTGGA   | T    | <i>NUTM2F</i>  | 1/1     | 1/1 | 0/0    | 0/1 | 0/1    | 0/1  | 0/0 | 1/1 | 0/1 |
| 9   | 19:20807178            | A         | AG   | <i>ZNF626</i>  | 1/1     | 1/1 | 0/0    | 0/0 | 0/1    | 1/1  | 0/0 | 0/1 | 0/1 |
| 10  | 18: 28662324           | C         | A    | <i>DSC2</i>    | 1/1     | 1/1 | 0/0    | 0/1 | 0/1    | 0/1  | 0/0 | 1/1 | 0/1 |

Ref: reference genome base type; Alt: altered sample genome base type; WES+SAS: Data were obtained by whole-exome sequencing and confirmed by Sanger sequencing. SAS: Data were only obtained by Sanger sequencing; 0: allele is the same as the reference; 1: allele is not the same as the reference.
